# Supplementary material
Source: PubMed Central journal article supplement (PMC1860900)
Supplement: heart_92_4_559__2.pdf [file heart_92_4_559__2.pdf]

## Diagnosis and management of patients with blackouts (ht68650)

AP Fitzpatrick and P Cooper

### Web only refs

1. Scheepers B, Clough P, Pickles C. The misdiagnosis of epilepsy: findings of a population study. *Seizure* 1998;**7**:403–6.
2. Smith D, Chadwick D. The misdiagnosis of epilepsy. *BMJ* 2002;**324**:495–496.
3. Zubcevic S, *et al.* Frequency of misdiagnosis of epilepsy in a group of 79 children with diagnosis of intractable epilepsy. *Epilepsia* 2001. *Proceedings of International League Against Epilepsy* 2001.
4. Brignole M, Alboni P, Benditt DG, *et al.* Guidelines on Management (Diagnosis and Treatment) of Syncope. The Task Force on Syncope, European Society of Cardiology. *Europace* 2004;**6**:467–537.
5. Lofving B. Cardiovascular adjustments induced from the rostral cingulate gyrus. *Acta Physiol Scand* 1961;**53**(Suppl. 184):1–82.
6. National Institute of Clinical Excellence. Falls: The assessment and prevention of falls in older people. Clinical Guideline 21. National Institute of Clinical Excellence, November 2004. ISBN: 1-84257-829-4.
7. [http://www.dh.gov.uk/PublicationsAndStatistics/Publications/PublicationsPolicyAndGuidance/PublicationsPolicyAndGuidanceArticle/fs/en?CONTENT\\_ID=4094275&ch=ehTaccC](http://www.dh.gov.uk/PublicationsAndStatistics/Publications/PublicationsPolicyAndGuidance/PublicationsPolicyAndGuidanceArticle/fs/en?CONTENT_ID=4094275&ch=ehTaccC)
8. Zaidi A, Benitez D, Gaydecki PA, *et al.* Haemodynamic effects of increasing angle of head up tilt. *HEART* 2000;**83**:181–4.
9. Immonen A, Juttila L, Kalviainen R, *et al.* Preoperative clinical evaluation, outline of surgical technique and outcome in temporal lobe epilepsy. *Adv Tech Stand Neurosurg* 2004;**29**:87–132 Review.
10. Sheldon R, Connolly S, Vasovagal Pacemaker Study II. Second Vasovagal Pacemaker Study (VPS II): rationale, design, results, and implications for practice and future clinical trials. *Card Electrophysiol Rev* 2003;**4**:411–5.
11. Ammirati F, Colivicchi F, Santini M, *et al.* Permanent cardiac pacing versus medical treatment for the prevention of recurrent vasovagal syncope: a multicenter, randomized, controlled trial. *Circulation* 2001;**104**:52–7.
12. Sutton R, Brignole M, Menozzi C, *et al.* Dual-chamber pacing in the treatment of neurally mediated tilt-positive cardioinhibitory syncope: pacemaker versus no therapy: a multicenter randomized study. The Vasovagal Syncope International Study (VASIS) Investigators. *Circulation* 2000;**102**:294–9.
13. Samoilo D, Grubb BP. Neurally mediated syncope and serotonin reuptake inhibitors. *Clin Auton Res* 1995;**5**:251–5.
